# Supplementary material for: Local air pollution from oil rig emissions observed during theairborne DACCIWA campaign
Source: Copernicus journal article supplement (doi:10.5194/acp-2019-27), 2019-02-05

**Manuscript title:** Local air pollution from oil rig emissions observed during the airborne DACCIWA campaign by Brocchi et al.

## RESPONSES TO JOSEPH PITT

**We thank the reviewer for his thoughtful comments that were helpful in improving the manuscript. Changes have been made in response to his specific comments listed below (in black). Our responses appear in red, and changes in the revised manuscript are highlighted in yellow.**

1) The main issue I have with the study as it stands regards the way the model measurement comparison is performed. It is not clear that comparing the peak mole fraction enhancement is the best way to do this, and at the very least this needs more discussion. For one thing, for narrow plumes the peak measured enhancement is often dependent on the e-fold time of the cell. Looking at Fig. 2 this might not be an issue here (if the actual plume width is much larger than the measurement e-fold time multiplied by the flight speed) but it is hard to be certain. Providing these details in the text might help to clear this up.

→ Considering that the SPIRIT instrument allows measurements every 1.6 s and the e-fold time of the cell is 5.3 s, and that the average aircraft speed is  $118 \text{ m s}^{-1}$  on July 10 ( $103 \text{ m s}^{-1}$  on July 14) during the period of the peaks of interest, even for the shortest lasting peak on each day (about 16 s on July 10 and about 19 s on July 14), the plume width is larger than the measurement e-fold time multiplied by the flight speed. We add a sentence for the worst case on July 10 (maximum aircraft speed with shortest lasting peak) in the text, p.6 lines 21-24: “Moreover, SPIRIT allows measurements every 1.6 s. Considering the case on July 10 where we have the maximum aircraft speed ( $118 \text{ m s}^{-1}$ ) and the shortest peak (lasting about 16 s), the plume width is larger than the measurement e-fold time multiplied by the flight speed. Thus, for all the narrow peaks, the maximum plume concentration is real, not a plume diluted with its surrounding environment.”

An alternative approach would be to compare the integrated area under each of the plume transects. This would then give a better idea of the total amount of each species within the plume (in the same way as is usually employed for calculating species-species enhancement ratios). Both approaches could be employed alongside each other as long as a suitable discussion of the issues above is included.

→ This approach seems to be more reliable considering the dispersion modelling error in FLEXPART for example due to horizontal and vertical resolution of the windfield. However, not to complicate the reading of the paper, we decide to keep only this approach and remove the first one used by explaining why it is not possible to do a peak-to-peak comparison. The text (1<sup>st</sup> paragraph of section 4.2) was modified as follows:

“Concerning the second and the fourth peak (Fig. 2a), the measurements show two close peaks that FLEXPART cannot simulate individually, leading to a single and broader simulated peak. This is probably due to an error in the dispersion modelling induced by the horizontal and vertical wind field resolution that prevents us from comparing peak-to-peak concentrations. Even with a finer wind field grid mesh of  $0.125^\circ \times 0.125^\circ$  (simulation not shown) such close peaks cannot be distinguished, suggesting a still insufficient spatial resolution. Instead, the integrated area under each of the measured and simulated plume transects will be compared and presented in Figure 3 with the percentages representing the relative differences with respect to SPIRIT measurements...”

According to this new approach, sensitivity tests with new fluxes were performed. They are summarized in Table 1. All the results of the simulations given now correspond to the integrated area under each peak (measured and simulated). We decided to summarize the results of all these new sensitivity tests by a figure instead of a table. This is illustrated in the new figure 3.

| Run name | Date of flight | NO <sub>2</sub> Flux<br>(kg s <sup>-1</sup> ) | SO <sub>2</sub> Flux<br>(kg s <sup>-1</sup> ) | CO Flux<br>(kg s <sup>-1</sup> ) | Injection height<br>(m) |
|----------|----------------|-----------------------------------------------|-----------------------------------------------|----------------------------------|-------------------------|
| CTRL     | 20160710       | 0.07                                          | 4.23×10 <sup>-5</sup> kg s <sup>-1</sup>      | 0.11 kg s <sup>-1</sup>          | 27                      |
|          | 20160714       |                                               |                                               |                                  |                         |
| ST1      | 20160710       | 0.07                                          | Not included                                  | Not included                     | 68                      |
|          | 20160714       |                                               |                                               |                                  | 77                      |
| ST2      | 20160710       | 0.035 - 0.05                                  | Not included                                  | Not included                     | 27                      |
|          | 20160714       |                                               |                                               |                                  |                         |
| ST3      | 20160710       | 0.035 - 0.05                                  | Not included                                  | Not included                     | 68                      |
|          | 20160714       |                                               |                                               |                                  | 77                      |

**Table 1.** Flux and injection height for the reference control run (CTRL) and for the sensitivity tests (ST) for each day of flight.

To interpret the results of figure 3 and show the sensitivity of FLEXPART to the input parameters (flux or injection height), simple statistical tests were made and a paragraph was added:

“To determine whether the observed linear relationship between the percentages and the flux or the injection height occurs by chance, a simple F-test is performed, assuming that the variances are homogeneous and the results follow a Gaussian distribution. F statistic coefficients are calculated and compared to the 95% or 90% confidence interval with (1, N-2) (N: total number of results) as degrees of freedom (see values in brackets [u;+∞[ in Figure 3). If the value F is included in the confidence interval then the relationship can be considered as linear. The standard errors on the slope are also added in the plots of Figure 3.

For the flight on July 10, the standard error of the slope coefficients and the F-test (95% of confidence) show linear relationships between the percentage difference and the flux. Only the results on July 14 for the plot with the injection height of VDI 3782 (1985, panel B-2) show a positive F-test but with a 90% of confidence. No conclusions can be drawn for the results on July 14 with the injection height of Briggs (1965, panel B-1). In order to show the response of FLEXPART to the injection height, panels A-3 and B-3 (Fig. 3) show the percentages versus the injection height (Briggs (1965) or VDI 3782 (1985)). FLEXPART shows similar results regardless of the injection height used as input whatever the flux used. All the cases show standard error on the slope coefficients larger than the slope itself and a F- value not included in the confidence interval (at 95% of confidence as shown in the Figure, and even 90%, not shown) . These results suggest that the differences between the two injection heights are not significant enough with respect to the vertical resolution of the model or the measurements are too far to be influenced by the changes in this parameter. However, to really

conclude about the injection height and to evaluate the flux, more measurements are needed at different altitudes and distances from the emission source. Besides the weather conditions and the functioning of the platform, the flight location is also an important parameter to be able to evaluate our measurements. Figures 2 b and e show the NO<sub>2</sub> plume simulated with FLEXPART as a function of distance from the source and altitude on July 10 and 14, respectively. The aircraft measurements, represented by the colored circles, are located at the upper part of the plume, away from the strongest concentrations. The work carried out is thus limited by the flight trajectories which were too high and too far from the FPSO platform to catch the part of the plume with the highest concentrations. The operational conditions during the flights were complex for the pilots, and safety concerns forced us to respect a minimum flight level (300 m) and a minimum distance from the source. Finally, we found that the NO<sub>2</sub> concentration difference between the measurements and the simulations does not seem to depend on the distance from the source since the measurements are already too far»

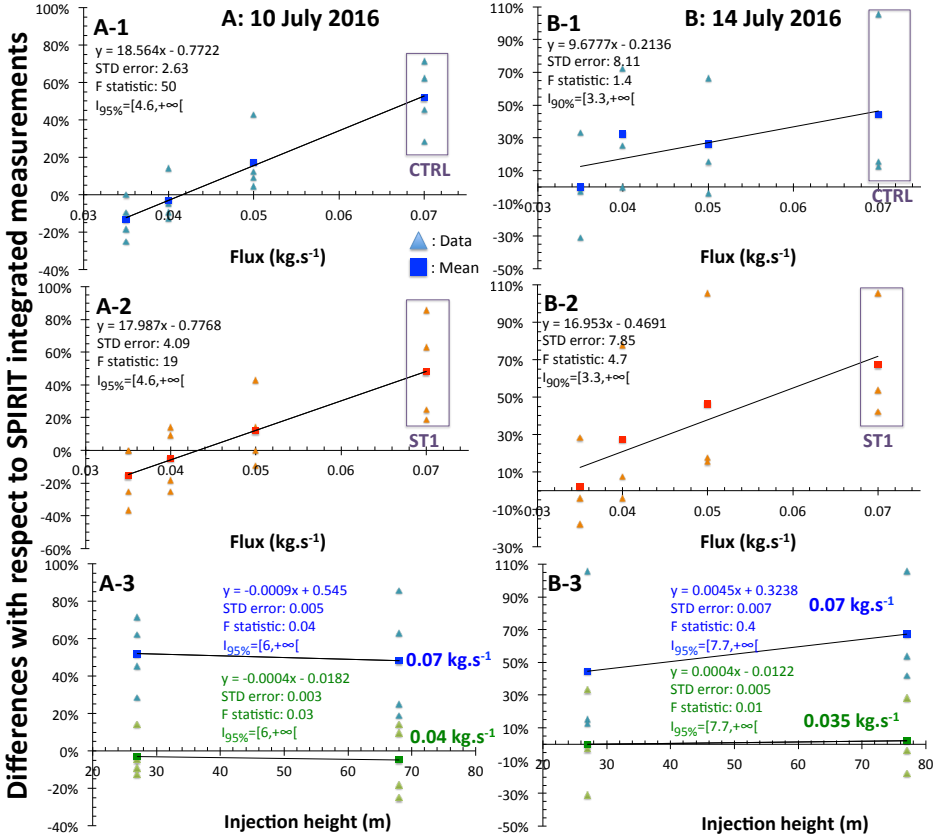

Figure 3: Differences (in %) between SPIRIT integrated measurements and FLEXPART simulations depending on flux or injection height used as input in the model for A: the flight on July 10 and B: the flight on July 14. Panels A-1 and B-1 represent the change in the percentage with the flux by using the injection height from Briggs' algorithm (1965; blue data; i.e. 27 m) and Panels A-2 and B-2 with injection height from VDI 3782 (1985; orange data; i.e. 68 m (A-2) or 77 m (B-2)). Panels A-3 and B-3 represent the change in the percentage with the injection height for the flux from Deetz and Vogel (2017; blue data; 0.07 kg.s<sup>-1</sup>) and for the flux used in the sensitivity tests (green data, 0.04 kg.s<sup>-1</sup> for July 10 (A-3) and 0.035 kg.s<sup>-1</sup> for July 14 (B-3)). For all panels, triangles represent the data for all the peaks measured and squares represent the mean from these data. The slope, standard error values for the slope coefficients and the F statistic are added for all the plots.

I also think it would really help interpret what is going on here if Fig. 2 included the results from the other simulations. If you really think it's getting too cluttered then these could be moved to the supplement, but I think it's important to include them somewhere.

→ We think it is better not to overload Fig. 2 as it makes it harder to read. Thus, we added a figure (Fig. S4) in the supplementary material showing the results of the sensitivity tests done with FLEXPART. We show the sensitivity tests ST2 and ST3 with the smallest differences compared to SPIRIT measurements according to Fig. 3, i.e. with a flux of  $0.04 \text{ kg s}^{-1}$  on July 10 and  $0.035 \text{ kg s}^{-1}$  on July 14.

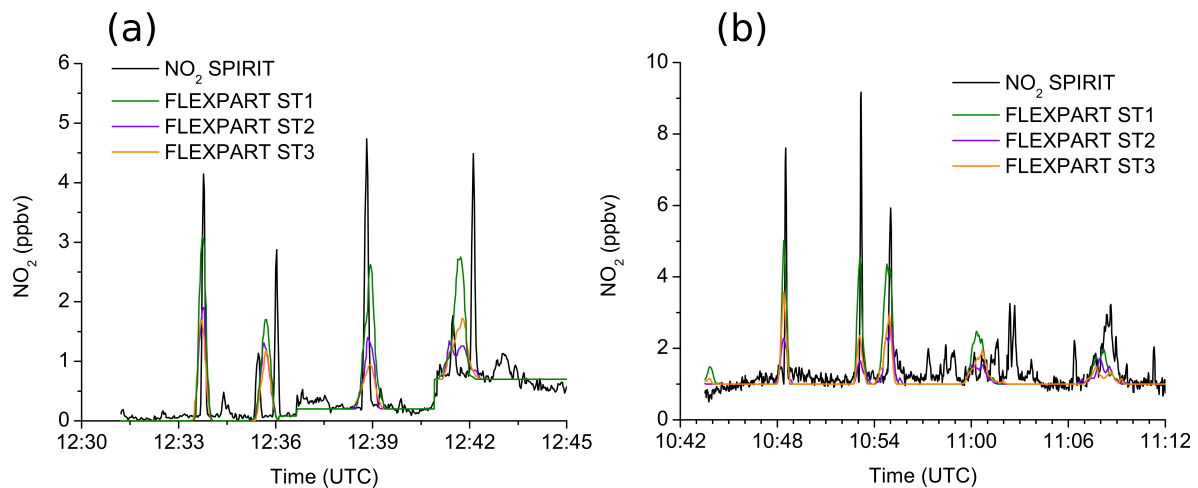

S4. (a) July 10:  $\text{NO}_2$  concentration as a function of time for SPIRIT measurements (black) and FLEXPART sensitivity test (ST) 1 (green), ST2 (purple; with a flux of  $0.04 \text{ kg s}^{-1}$ ), ST3 (orange; with a flux of  $0.04 \text{ kg s}^{-1}$ ). (b) Similar to (a) for July 14 with a flux of  $0.035 \text{ kg s}^{-1}$  for ST2 and ST3.

2) The lack of CO in the plumes measured on flight 1, and the subsequent detection of CO in the flight 2 plumes, is a really interesting result. However the discussion in Sect. 4.3 is fairly brief – it would be great to see this expanded. I'm not really clear as to what is meant by "more disturbed weather conditions" – does this mean the boundary layer was more turbulent? If so why does this mean that the combustion is less efficient? I'm not disputing that is the case, it's just not obvious to me without further explanation. I can see that probing the fluid dynamics within the flare is beyond the scope here, but are there other studies that this finding could be linked to?

→ As far as we know, this finding could not be linked to any other study. The expression "more disturbed weather conditions" was removed and the explanations were clarified as follows: "The observed difference between July 10 and 14 in terms of CO emissions mostly lies in the different wind conditions between these two days: first, the wind speed was lower on July 14, which makes less  $\text{O}_2$  available to burn with natural gas; second, it appears that the wind direction was not clearly established, as can be seen from the much more dispersed plume in Fig. 1b, resulting in incomplete combustion pockets favoring CO formation. However, a decrease in efficiency should also lead to lower temperatures and  $\text{NO}_x$  emissions, which is not observed here. The results of this campaign would require to be analyzed in the light of computational fluid dynamic simulations, accounting for a realistic natural gas composition and its high-temperature chemistry, which are beyond the scope of this study."

Were there any measurements of CO<sub>2</sub> (and ideally CH<sub>4</sub>) on board? Then something quantitative could be said about the flare efficiency?

→ A Picarro instrument was brought to measure CO<sub>2</sub> during the campaign but it actually did not work at all because of a technical problem. CH<sub>4</sub> was measured by the SPIRIT instrument. Unfortunately, the flight conditions for these specific days were not ideal with very high temperatures inside the aircraft cabin that did not allow the CH<sub>4</sub> laser to work properly.

### Specific points:

P2 L2 – In Nigeria all associated gas may well be flared, but in other places (at least in the UK) this associated gas is exported for use. So I think it would be more accurate to say that gas flaring is used to dispose of this natural gas in cases where the infrastructure to export it does not exist.

→ Modified following the recommendation: “Gas flaring is used to dispose of this natural gas in cases where the infrastructure to export it does not exist”

P3 L25 – “The concept...deeper water” – sentence reads awkwardly and needs rephrasing

→ It has been rephrased this way: “The concept of those platforms based on ship structure makes possible the development of small size oil fields and the exploitation of them further from the coast and thus in deeper water”

P3 L28 – I suggest “dispose of” rather than “eliminate”

→ We followed the suggestion and used “dispose of”.

P3 L30 – “mixture of gas” is ambiguous – presumably this means a mixture of emitted gases?

→ Yes, it has been modified as “This leads to a mixture of emitted gases”.

P4 L7 – “released along time” needs rewording

→ We modified it as follows: “It simulates long-range transport and dispersion of atmospheric tracers released over time”.

P4 L11 – If I understand correctly these are just tracer particles, so their assigned mass is just a nominal quantity used in the subsequent calculations (i.e. it does not correspond to a physical mass which impacts on the particle dispersion). If so I think it would be best to clarify this, as particle mass has quite a strong association for people who work with aerosols.

→ We agree, the model only considered NO<sub>2</sub> as tracer particles. All the particles undergo the same transport. The mass input in the “release” file is considered as a flux of NO<sub>2</sub> (a mass release during time). However, the other parameters such as molecular mass, OH reaction rate constant, Henry law constant... have also to be included and are taken into account for the wet and dry deposition calculations. We removed the sentence: “In this mode, each particle is associated to a given mass of tracer released during the time of the simulation” and add complementary information in the text and in Table 1: “The particles are released with the chemical properties of NO<sub>2</sub>, CO and SO<sub>2</sub> using constant emissions from Deetz and Vogel (2017) inventory during 7 h with a spin-up of 5 h, allowing the model to be balanced independently from the initial conditions. During the simulation, the NO<sub>2</sub> and SO<sub>2</sub> like particles mass is lost by wet and dry deposition and by OH reaction (concentrations from GEOS-CHEM model; Technical note FLEXPART v8.2, <http://flexpart.eu/downloads/26>), which allows a lifetime of about 3 h at 298 K in the MBL for NO<sub>2</sub>. CO like particles mass is only lost by OH reaction.”

P4 L20 – “for the DACCIWA project”

→ Modified following the suggestion.

P5 L2 – I think it would be useful to add a sentence in here explaining both the buoyancy and momentum effects. This would make it easier to understand the subsequent assertion that the momentum effect can be ignored.

→ We added a small definition for each effect in the text: “Indeed, the buoyancy corresponds to a density ratio between the air parcel and its colder surrounding environment and leads to the rise of this parcel under the influence of gravity. This effect is to be distinguished from the momentum effect defined as the product of an element mass by its velocity, which can be neglected for such high temperature plume (Briggs, 1965).”

P5 L31 – P6 L3 – The description of the terms in Eq. 4 is not easy to read. It might make it clearer to define the units of the constituent terms rather than the coefficient 74.4? Also the phrase “f as the fraction of radiated heat equals to 0.27” confuses me.

→ The units of all constituents, in particular Q and H (in MW), have been added in the manuscript.

→ The phrase has been rewritten as follows: “f (as) the fraction of radiated heat set to 0.27 by Deetz and Vogel (2017), after having averaged the f values given in Guigard et al. (2000)”.

P6 L30 – How is the background calculated – presumably by averaging the measured data outside the plumes? If so then it’s worth stating this.

→ It is true that the background has been calculated by averaging the measured data outside the plumes. We added a sentence in the text explaining it: “This value is an average of the measurements taken outside the plume”.

P7 L27 – “only a few quantities of pollutants” needs rewording

→ It has been modified as follows: “only a small fraction of pollutants”.

P8 L7 – “The turbulence increases the mixing and affects...” might be better

→ Yes, modified accordingly

Fig. 1 – I trust your word that there was no SO<sub>2</sub> measured, but you might as well add an SO<sub>2</sub> trace to the CO plots just to demonstrate this point.

→ More precisely, we wrote that no SO<sub>2</sub> (and CO) peaks were detected simultaneously to NO<sub>2</sub> peaks. This is shown in the plots we added for the SO<sub>2</sub> measurements in Figure 1. The legend was also modified. SO<sub>2</sub> FLEXPART simulation was also realized and shows insignificant SO<sub>2</sub> concentration at the aircraft sampled location. A sentence has been added in the text: “Considering the very low SO<sub>2</sub> flux, the FLEXPART simulations in the CTRL run induce insignificant SO<sub>2</sub> concentration at aircraft sampled location (results not shown).”

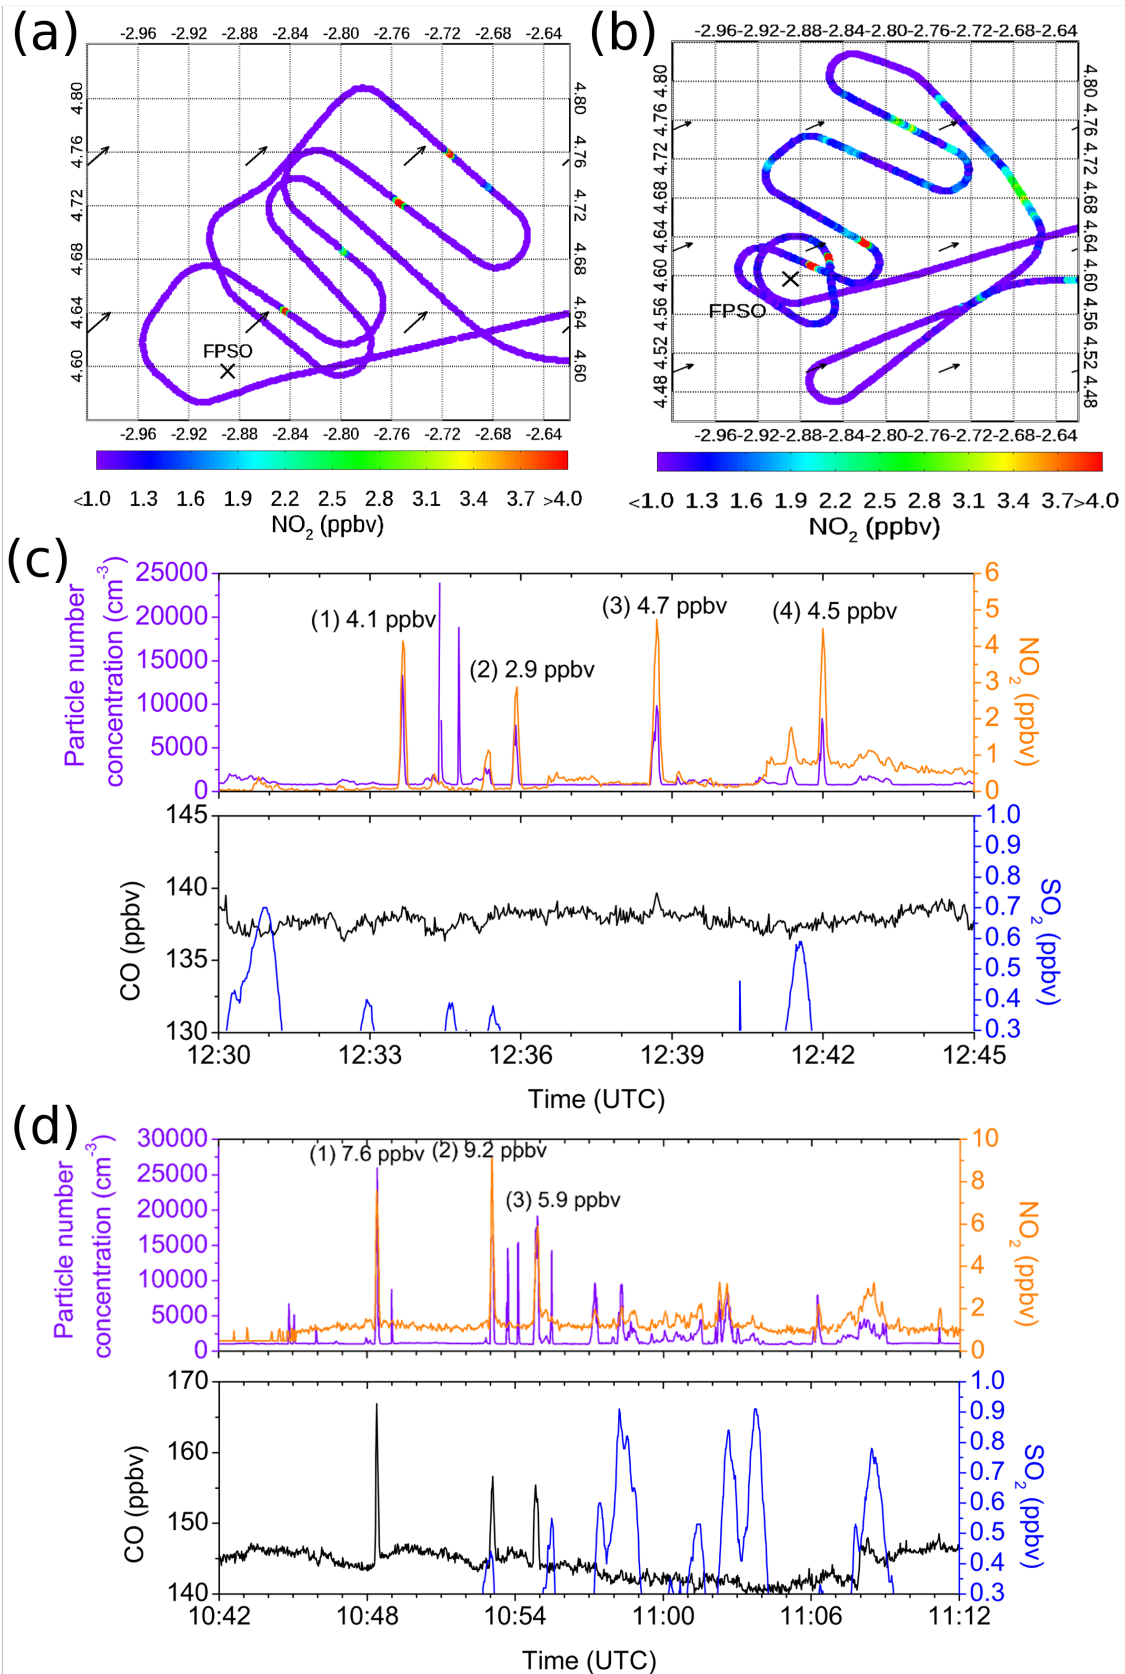

Figure 1: (a) NO<sub>2</sub> concentration as a function of the flight trajectory downwind of the FPSO plume for July 10. The black arrows show the wind direction (from ECMWF). (c) NO<sub>2</sub>, aerosol, CO and SO<sub>2</sub> concentrations as a function of time zoomed in a part of the flight trajectory in (a). The peaks studied are labelled by a number (from 1 to 4). (b) and (d) are similar to (a) and (c) for July 14.

Fig. 2 – Could you make the circles around the measured data in panels b) and e) more distinct please? At least on my screen it is really hard to make these out, especially in b). See also my main point 1)

→The circles on Figure 2 have been highlighted as shown below. Moreover, a small error was detected on this figure. Fig. 2 (e) was not taken at the right time in the first version of the paper. This is modified in this version but it does not modify the conclusions of the article.

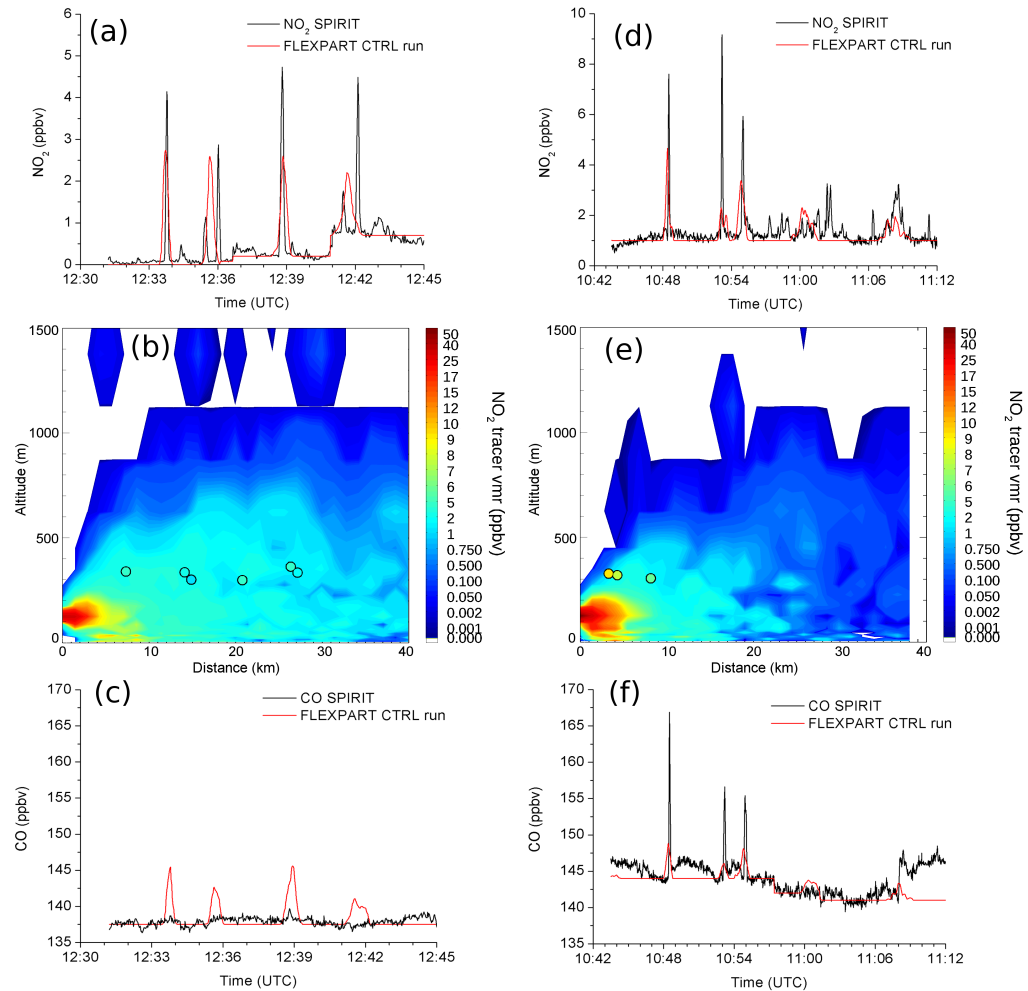

Supplement: Supplementary file [file acp-2019-27-AC1-supplement.pdf]
