# Supplementary material for: Local air pollution from oil rig emissions observed during theairborne DACCIWA campaign
Source: Copernicus journal article supplement (doi:10.5194/acp-2019-27), 2019-02-05
Supplement: Supplementary file 1 [file acp-2019-27-supplement.pdf]

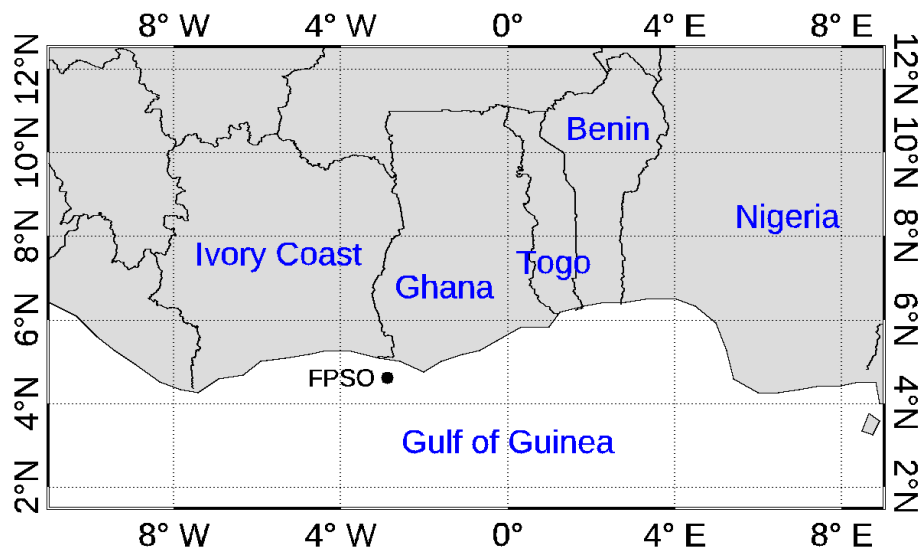

**S1.** General location of the DACCIIWA research site in southern West Africa. The black dot marks the location of the FPSO vessel.

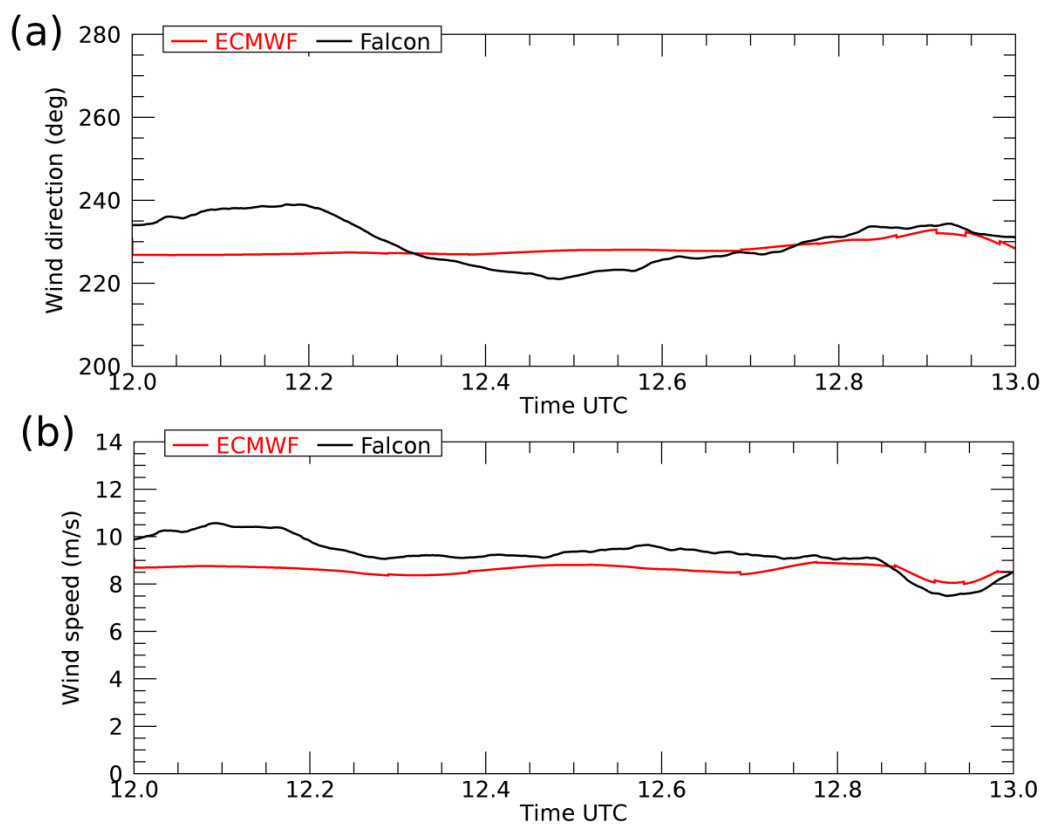

**S2.** Comparison between time series of observed (black) and simulated (red) wind direction (a) and wind speed (b) for July 10, zoomed in on the period of the flight surrounding the  $\text{NO}_2$  peaks.

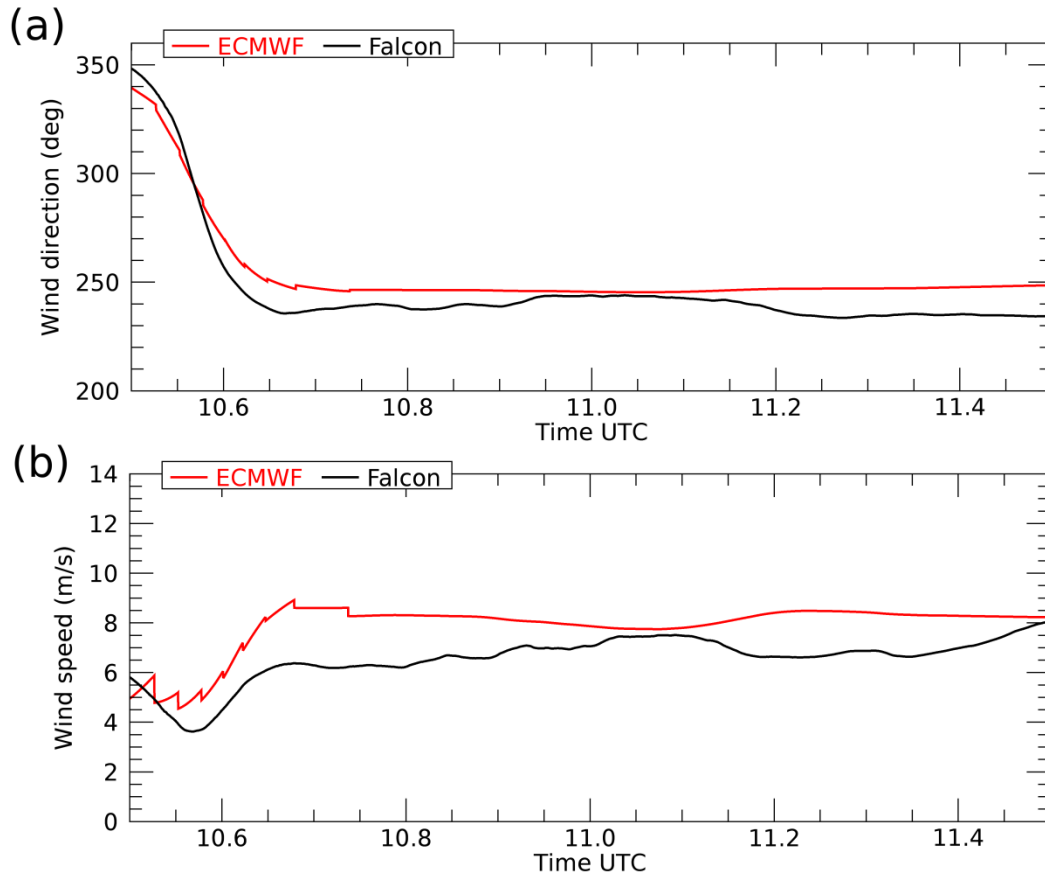

**S3.** Comparison between time series of observed (black) and simulated (red) wind direction (a) and wind speed (b) for July 14, zoomed in on the period of the flight surrounding the  $\text{NO}_2$  peaks.
